# Supplementary material for: A borate-rich, cross-linked gel polymer electrolyte with near-single ion conduction for lithium metal batteries
Source: Royal Society of Chemistry journal article supplement (doi:10.1039/c9ta05938e), 2019-01-01
Supplement: c9ta05938e1.pdf [file c9ta05938e1.pdf]

## Supporting Information

# A Borate Concentrated, Crosslinked Gel Polymer Electrolyte with Near-Single Ion Conduction for Lithium Metal Batteries

Kuan Dai,<sup>a</sup> Cheng Ma,<sup>a</sup> Yiming Feng,<sup>a</sup> Liangjun Zhou,<sup>a</sup> Guichao Kuang,<sup>a</sup> Yun Zhang,  
<sup>b</sup> Yanqing Lai,<sup>a</sup> Xinwei Cui<sup>c,\*</sup> and Weifeng Wei<sup>a,\*</sup>

<sup>a</sup> State Key Laboratory of Powder Metallurgy, Central South University, Changsha,  
Hunan 410083, China

<sup>b</sup> Department of Advanced Energy Materials, College of Materials Science and  
Engineering, Sichuan University, Chengdu 610064, China

<sup>c</sup> College of Materials Science and Engineering, Zhengzhou University, Zhengzhou  
450001, P. R. China

\* Corresponding authors: Weifeng Wei, Xinwei Cui

E-mail: [weifengwei@csu.edu.cn](mailto:weifengwei@csu.edu.cn); [langocui@hotmail.com](mailto:langocui@hotmail.com)

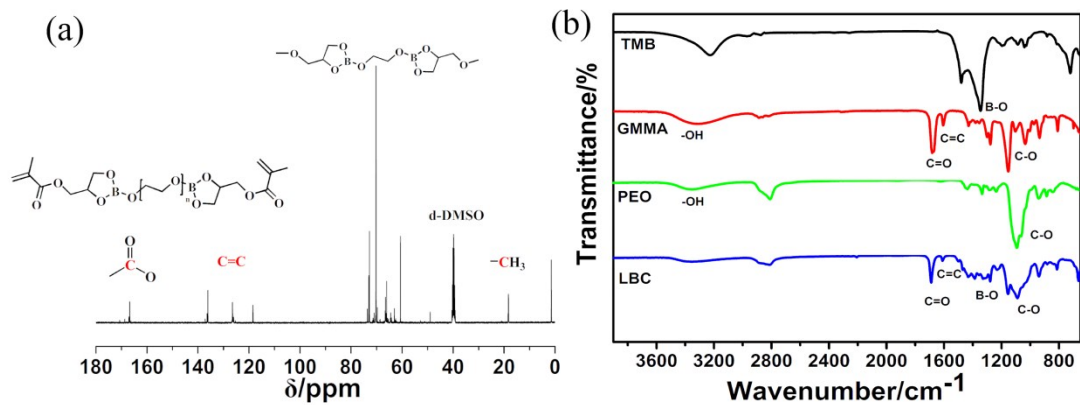

**Figure S1.** (a)  $^{13}\text{C}$ -NMR spectrum of the LBC (b) FT-IR spectra of the TMB, PEG, GMMA and LBC.

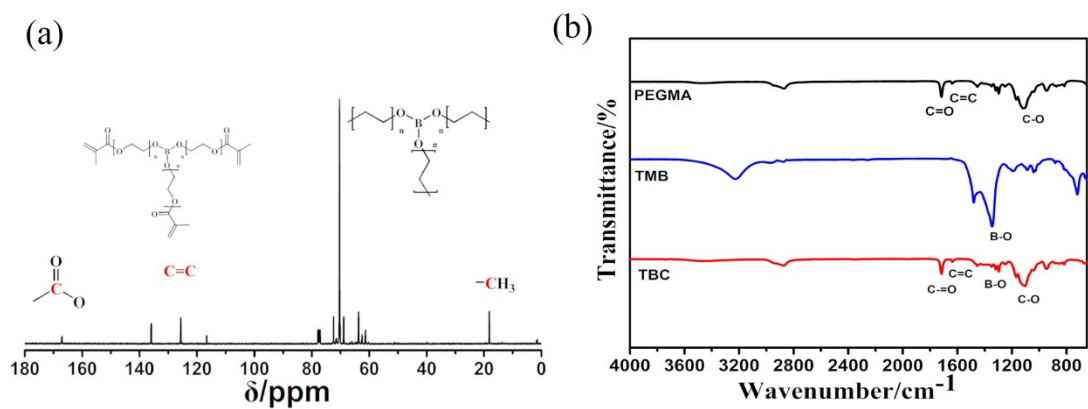

**Figure S2.** (a)  $^{13}\text{C}$ -NMR spectrum of TBC (b) FT-IR spectra of TMB, PEGMA and TBC.

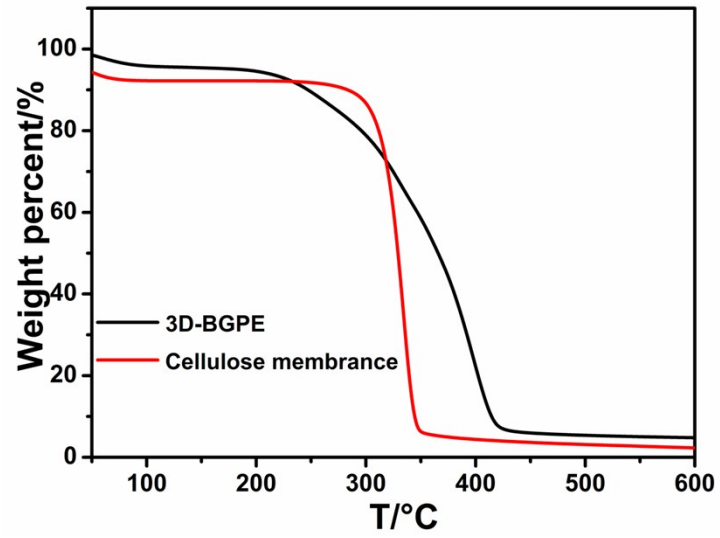

**Figure S3.** TGA thermograms of 3D-BGPE and cellulose membrane.

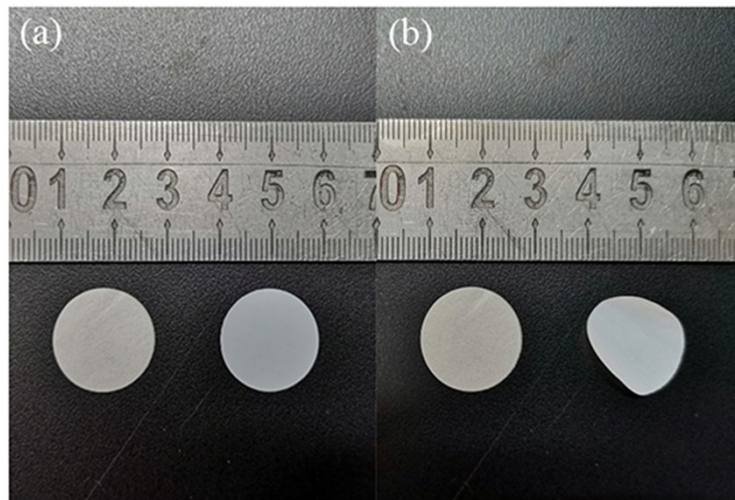

**Figure S4.** Thermal shrinkage of the 3D cross-linking membrane (left) and a commercial separator (right) (a) before and (b) after exposure to 150°C for 10 min.

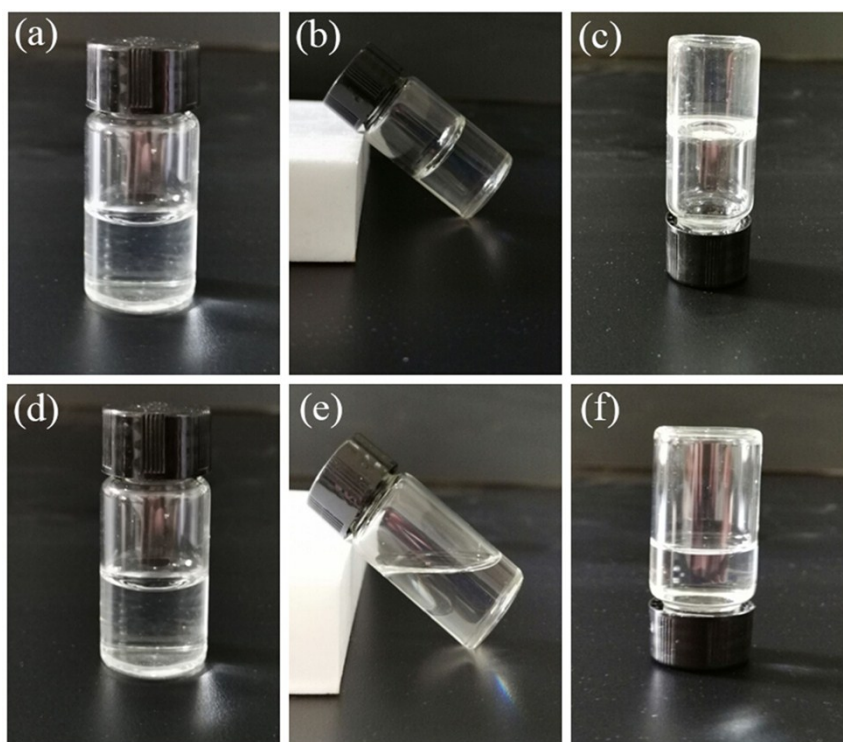

Figure S5. Optical photographs of the LE and 3D-BGPE.

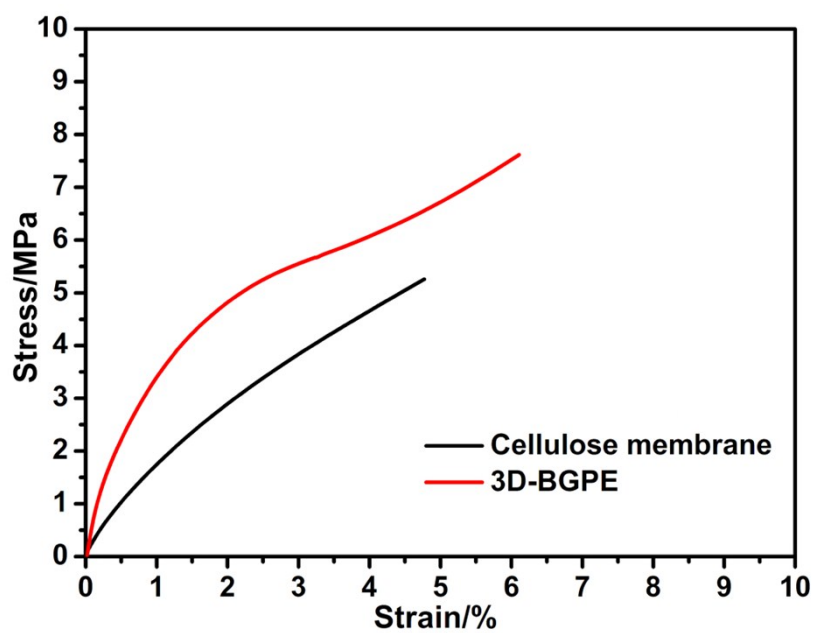

Figure S6. Stress-strain curves of 3D-BGPE and cellulose membrane.

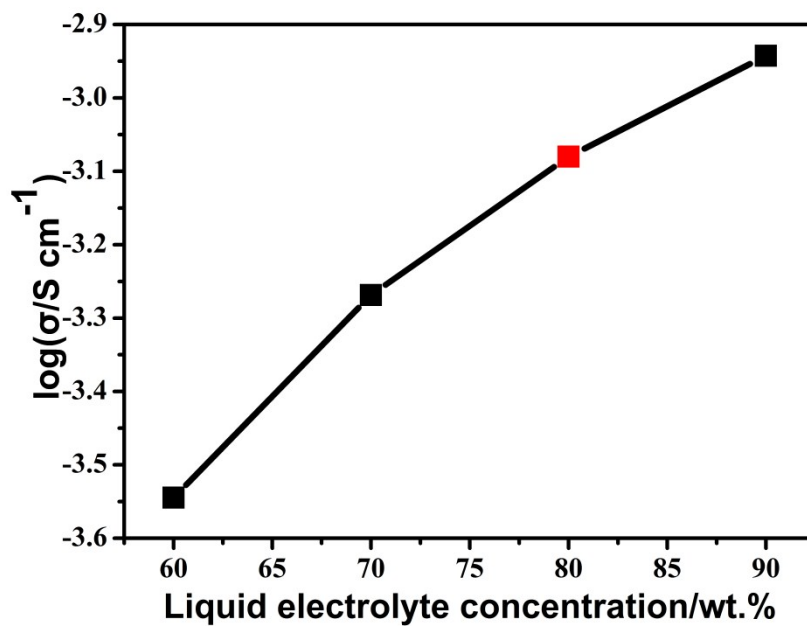

Figure S7. Ionic conductivity dependence on EC/DMC concentration for gel polymer electrolyte at 30 °C.

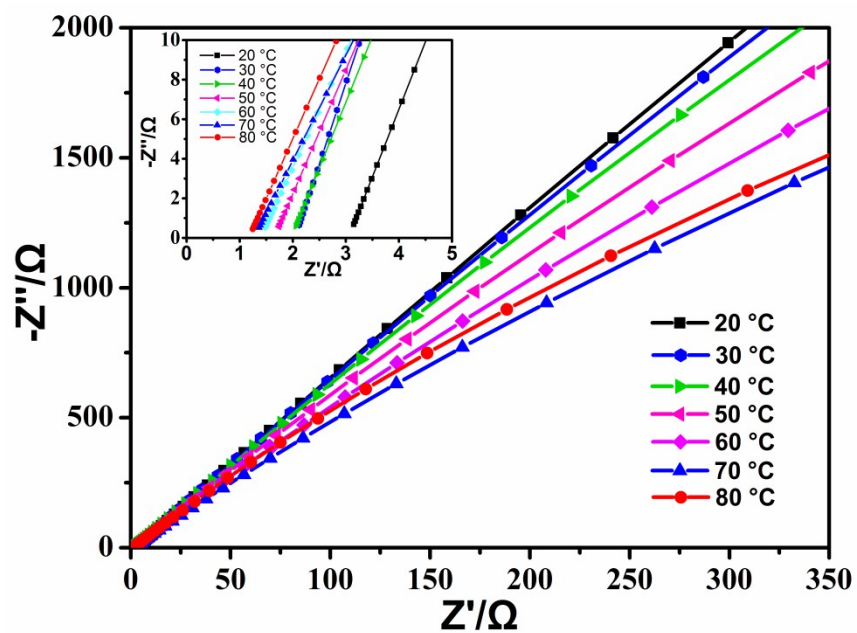

Figure S8. EIS of a SS|3D-BGPE|SS symmetrical cell with the elevation of temperature.

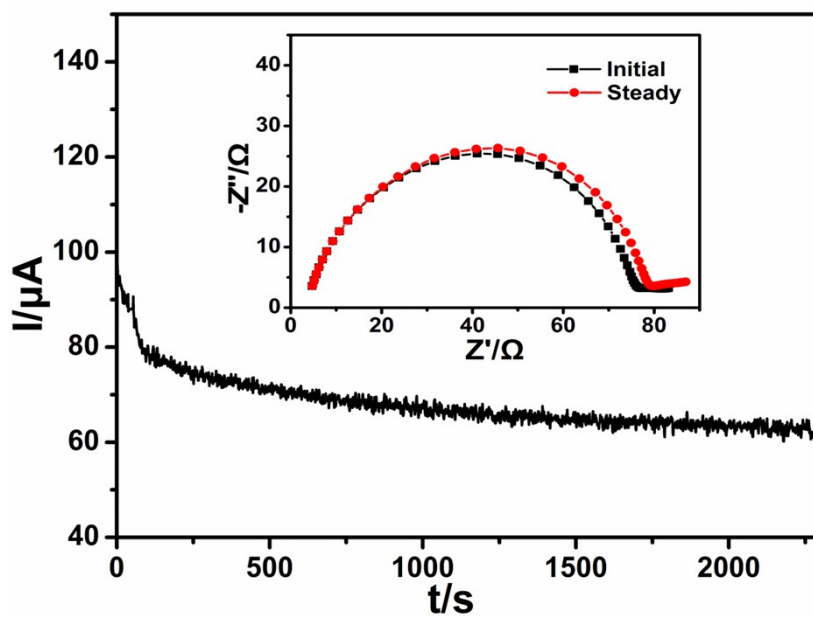

**Figure S9.** Current variation with polarization of a Li|LE|Li symmetrical cell with an applied potential of 10 mV and EIS before and after polarization.

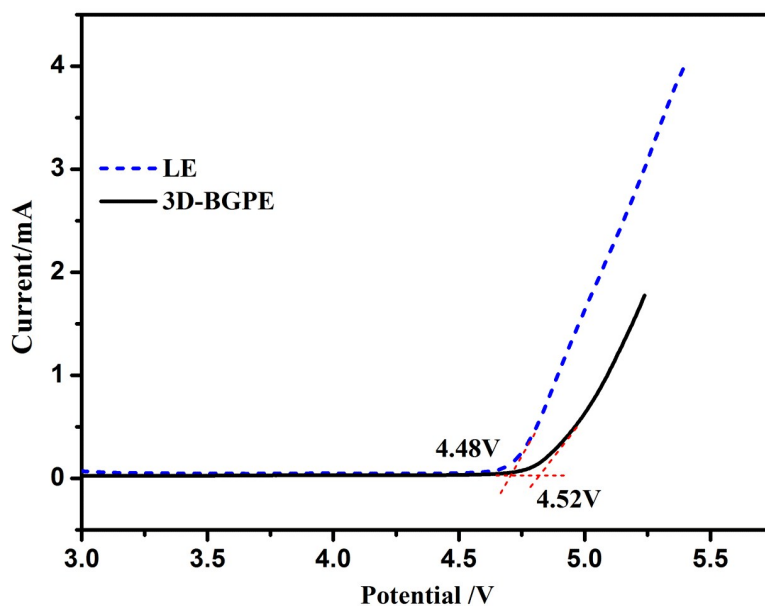

**Figure S10.** Linear sweeping voltammetry curves of the Li/3D-BGPE/SS cell and Li/LE/SS cell at 30 °C.

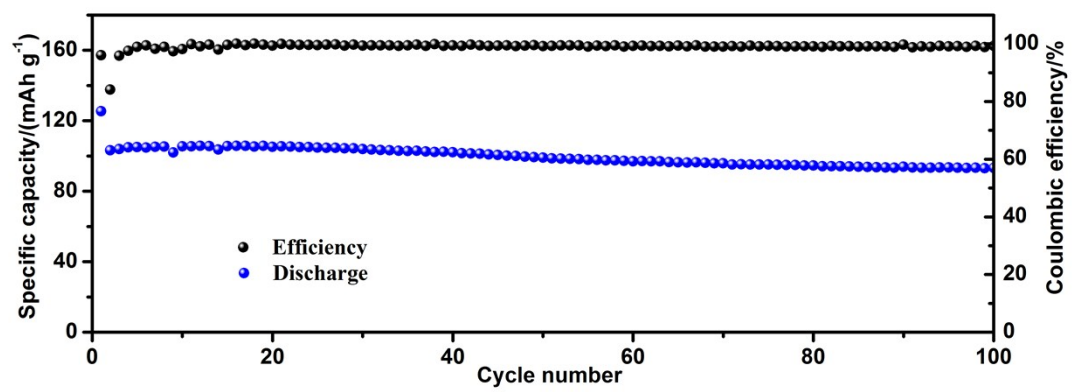

**Figure S11.** Cycling performance of LiFePO<sub>4</sub>/3D-BGPE/ Li cell at 2C at 30 °C.

**Table S1.** EIS results of the LiFePO<sub>4</sub>/3D-BGPE/Li and LiFePO<sub>4</sub>/LE/Li cells after 10 cycles and 50 cycles at 0.5 C

| Battery sample     | After 10 cycles |       |          | After 50 cycles |       |          |
|--------------------|-----------------|-------|----------|-----------------|-------|----------|
|                    | $R_b$           | $R_f$ | $R_{ct}$ | $R_b$           | $R_f$ | $R_{ct}$ |
| 3D-BGPE            | 2.95            | 39.0  | 41.0     | 3.65            | 41.7  | 42.1     |
| Liquid electrolyte | 2.75            | 10.5  | 23.1     | 4.62            | 26.5  | 32.9     |

The EIS curves were analyzed using an equivalent circuit by *Z-view* software. In the equivalent circuit,  $R_b$  represents bulk resistance,  $R_f$  represents interface resistance,  $R_{ct}$  represents charge transfer resistance,  $Z_w$  represents Warburg impedance, and CPE1 and CPE2 are the constant phase elements. The simulation results are summarized in **Table S1**. It is apparently seen that the LiFePO<sub>4</sub>/3D-BGPE/Li cell displays an interfacial resistance ( $R_f$  and  $R_{ct}$ ) with negligible variance after 10 cycles and 50 cycles, while the interfacial resistance of LiFePO<sub>4</sub>/LE/Li cell increases noticeably. The negligible variance in interfacial resistance suggests that the interface between electrode and 3D-BGPE keeps steady during charge-discharge cycles, which leads to the superior cycling stability of LiFePO<sub>4</sub>/3D-BGPE/Li cell as shown in Figure 6c.
